# Supplementary material for: Objective 18-month Comparison of the Tolerability of 2 Dermal Fillers Formulated with Tri-Hyal Technology
Source: PubMed Central journal article supplement — Plast Reconstr Surg Glob Open. 2020 Dec 9;8(12):e3274. doi: 10.1097/GOX.0000000000003274 (PMC7787280; doi:10.1097/gox.0000000000003274), 2020-12-09
Supplement: gox-8-e3274-s001.pdf [file gox-8-e3274-s001.pdf]

## SDC1. Adverse events.

| Time | Reinjection | Time of reinjection | Treatment | Event side | Event type*     | Site | Intensity | Duration   | Causality | Resolved at next visit |
|------|-------------|---------------------|-----------|------------|-----------------|------|-----------|------------|-----------|------------------------|
| D210 | NA          | NA                  | NA        | NA         | Gastroenteritis | NA   | Severe    | Transitory | Excluded  | Yes                    |
| D270 | Yes         | D180+D270           | Control   | Left       | Ecchymosis      | CF   | Slight    | Persistent |           | Yes                    |
| D270 | Yes         | D180+D270           | NA        | NA         | Ecchymosis      | CF   | Slight    | Persistent | Certain   | No                     |
| D270 | Yes         | D180                | Control   | Left       | Erythema        | NL   | Slight    |            |           | Yes                    |
| D270 | Yes         | D180                | Test      | Right      | Erythema        | NL   | Moderate  | Persistent | Certain   | Yes                    |
| D270 | Yes         | D180                | Both      | Both       | Nodules         | CF   | Slight    |            |           | No                     |
| D270 | Yes         | D180                | Both      | Both       | Nodules         | CF   | Slight    |            |           | Partially              |
| D270 | No          | NA                  | Control   | Left       | Nodule          | NL   | Slight    |            |           | Yes                    |
| D270 | No          | NA                  | Control   | Left       | Nodule          | CF   | Slight    |            |           | No                     |
| D278 | Yes         | D180                | Test      | Right      | Rosacea         | NL   | Moderate  | Persistent | Certain   | Yes                    |
| D278 | Yes         | D180                | Control   | Left       | Rosacea         | NL   | Slight    | Persistent | Certain   | Yes                    |
| D284 | Yes         | D180+D270           | NA        | NA         | Ecchymosis      | CF   | Slight    | Transitory | Certain   | Yes                    |
| D284 | Yes         | D180+D270           | Both      | Both       | Pain            | NL   | Slight    |            |           | No                     |
| D300 | Yes         | D270                | Both      | Both       | Nodules         | CF   | Slight    |            |           | Yes                    |
| D300 | Yes         | D270                | Both      | Both       | Edema           | NL   | Moderate  | Persistent | Certain   | Yes                    |
| D315 | Yes         | D180+D270           | NA        | NA         | Hypoesthesia    | NL   | Slight    | Transitory | Certain   | Yes                    |
| D360 | No          | NA                  | NA        | NA         | Seborrheic      | NA   |           |            | Excluded  | Yes                    |

|      |     |           |         |      |                |    |        |  |  |     |
|------|-----|-----------|---------|------|----------------|----|--------|--|--|-----|
|      |     |           |         |      | dermatitis     |    |        |  |  |     |
| D360 | Yes | D180      | Both    | Both | Nodules        | CF | Slight |  |  | Yes |
| D360 | Yes | D180      | Control | Left | Dyschromia     | CF | Slight |  |  | Yes |
| D360 | Yes | D180      | Test    | Left | Nodule         | CF | Slight |  |  | Yes |
| D360 | No  | NA        | Control | Left | Nodule         | CF | Slight |  |  | Yes |
| D360 | Yes | D180      | Control | Left | Overcorrection | NL | Slight |  |  | Yes |
| D360 | Yes | D180+D270 | Both    | Both | Pain           | NL | Slight |  |  | Yes |

\* With the exception of gastroenteritis all adverse events were local. CF, crow's feet; D, day; NL, nasolabial; Test, ART FILLER Universal filler and/or ART FILLER Fine lines; NA, not applicable.
