# Supplementary material for: Objective 18-month Comparison of the Tolerability of 2 Dermal Fillers Formulated with Tri-Hyal Technology
Source: PubMed Central journal article supplement — Plast Reconstr Surg Glob Open. 2020 Dec 9;8(12):e3274. doi: 10.1097/GOX.0000000000003274 (PMC7787280; doi:10.1097/gox.0000000000003274), 2020-12-09
Supplement: gox-8-e3274-s003.pdf [file gox-8-e3274-s003.pdf]

**SDC 3.** Wrinkle volume measured by SkinStation® and skin thickness measured by High Frequency Ultrasound.

|                                                             | Mean ± Standard deviation |            |            |            |            |            |            |
|-------------------------------------------------------------|---------------------------|------------|------------|------------|------------|------------|------------|
|                                                             | D0                        | D30/45*    | D90        | D180       | D270       | D360       | D540       |
| <b>Control</b>                                              |                           |            |            |            |            |            |            |
| Crow's feet volume ( $\mu\text{m}^3/\text{mm}^2$ )          | 31.82±6.94                | 23.74±4.74 | 23.97±4.83 | 26.33±4.37 | 21.20±3.9  | 21.83±3.96 | 25.34±6.59 |
| Crow's feet thickness ( $\mu\text{m}^3/\text{mm}^2$ )       | 1.51±0.20                 | 1.56±0.25  | 1.61±0.27  | 1.70±0.30  | 1.81±0.37  | 1.68±0.28  | 1.67±0.25  |
| Nasolabial folds volume ( $\mu\text{m}^3/\text{mm}^2$ )     | 38.67±9.40                | 29.46±7.0  | 28.63±5.84 | 26.33±5.14 | 27.12±4.99 | 26.55±6.04 | 29.35±6.15 |
| Nasolabial folds thickness ( $\mu\text{m}^3/\text{mm}^2$ )  | 1.79±0.27                 | 1.87±0.32  | 1.95±0.35  | 1.95±0.31  | 2.00±0.29  | 1.97±0.38  | 1.97±0.31  |
| <b>ART FILLER Universal filler or ART FILLER Fine lines</b> |                           |            |            |            |            |            |            |
| Crow's feet volume ( $\mu\text{m}^3/\text{mm}^2$ )          | 31.50±5.78                | 24.01±4.64 | 23.94±4.29 | 23.15±3.81 | 21.84±4.04 | 22.10±3.76 | 26.57±5.17 |
| Crow's feet thickness ( $\mu\text{m}^3/\text{mm}^2$ )       | 1.54±0.24                 | 1.56±0.23  | 1.61±0.24  | 1.71±0.28  | 1.77±0.38  | 1.70±0.33  | 1.65±0.26  |
| Nasolabial folds volume ( $\mu\text{m}^3/\text{mm}^2$ )     | 40.62±9.80                | 29.62±7.27 | 29.19±6.44 | 27.26±5.43 | 24.43±4.79 | 27.24±5.74 | 30.18±6.69 |
| Nasolabial folds thickness ( $\mu\text{m}^3/\text{mm}^2$ )  | 1.75±0.26                 | 1.85±0.29  | 1.95±0.32  | 1.98±0.32  | 2.05±0.35  | 1.95±0.34  | 1.94±0.33  |

\* Evaluated at Day 45 in patients who received an additional injection on Day 14. D, day.
